# Supplementary material for: Top-seeded solution crystal growth of noncentrosymmetric and polar K3V5O14
Source: Royal Society of Chemistry journal article supplement (doi:10.1039/c2ce25931a), 2012-01-01

## Electronic Supplementary Information (ESI)

Figure S1. TG/DTA analysis for polycrystalline  $\text{K}_3\text{V}_5\text{O}_{14}$ .

Figure S2. XRD data of residue after TG/DTA measurement.

Figure S3. X-ray diffraction for {10-10} planes.

Figure S4. X-ray diffraction for {0001} planes.

Figure S5. UV-vis diffuse reflectance spectra for ground  $\text{K}_3\text{V}_5\text{O}_{14}$  crystal.

Figure S6. Displacement versus electric field (300 V) plot for Z-cut of  $\text{K}_3\text{V}_5\text{O}_{14}$  single crystal.

Figure S7. Displacement versus electric field (500 V) plot for Z-cut of  $\text{K}_3\text{V}_5\text{O}_{14}$  single crystal.

Figure S8. Displacement versus electric field (800 V) plot for Z-cut of  $\text{K}_3\text{V}_5\text{O}_{14}$  single crystal.

Figure S9. Polarization vs. temperature data, and the temperature dependence of the pyroelectric coefficient for Z-cut of  $\text{K}_3\text{V}_5\text{O}_{14}$  single crystal.

Figure S10. Polarization vs electric field plots at 16 kV/cm at different frequencies for a Z-cut  $\text{K}_3\text{V}_5\text{O}_{14}$  single crystal.

Figure S1. TG/DTA analysis for polycrystalline  $K_3V_5O_{14}$ .

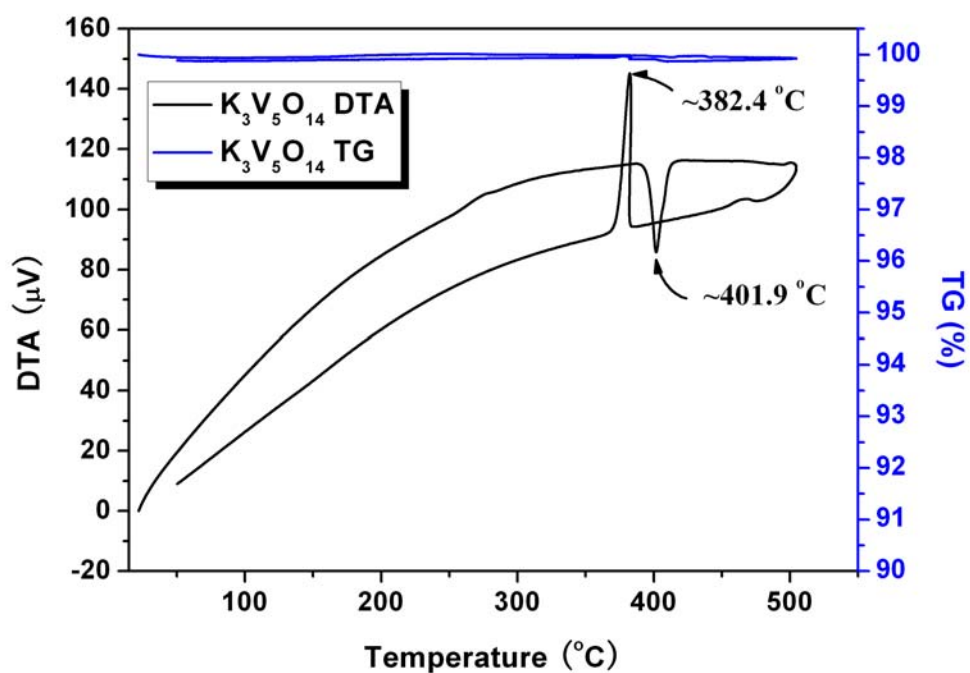

Figure S2. XRD data of residue after TG/DTA measurement.

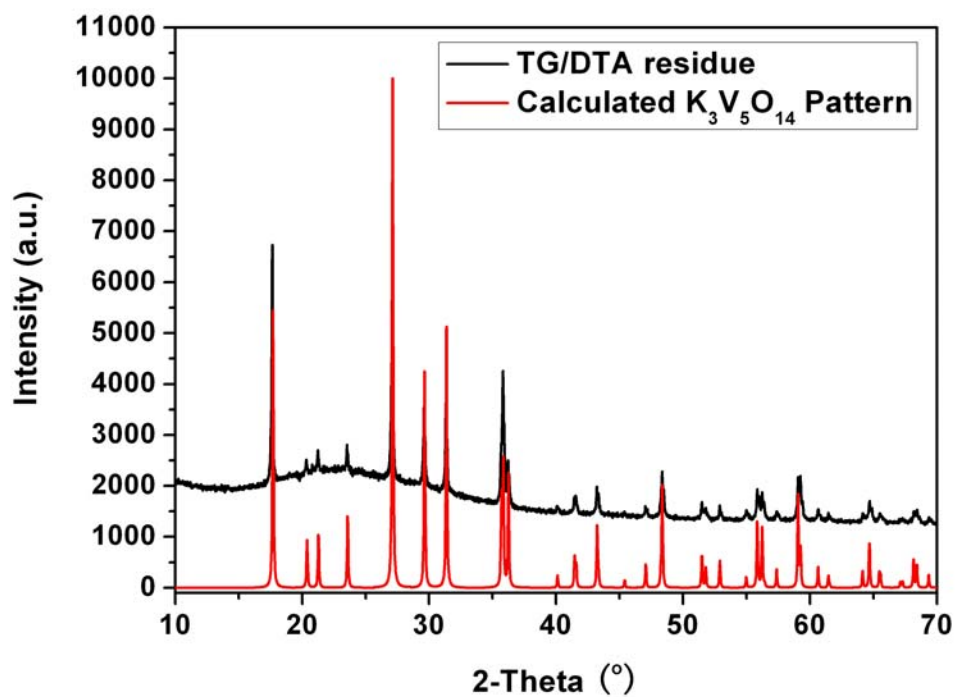

Figure S3. X-ray diffraction for {10-10} planes.

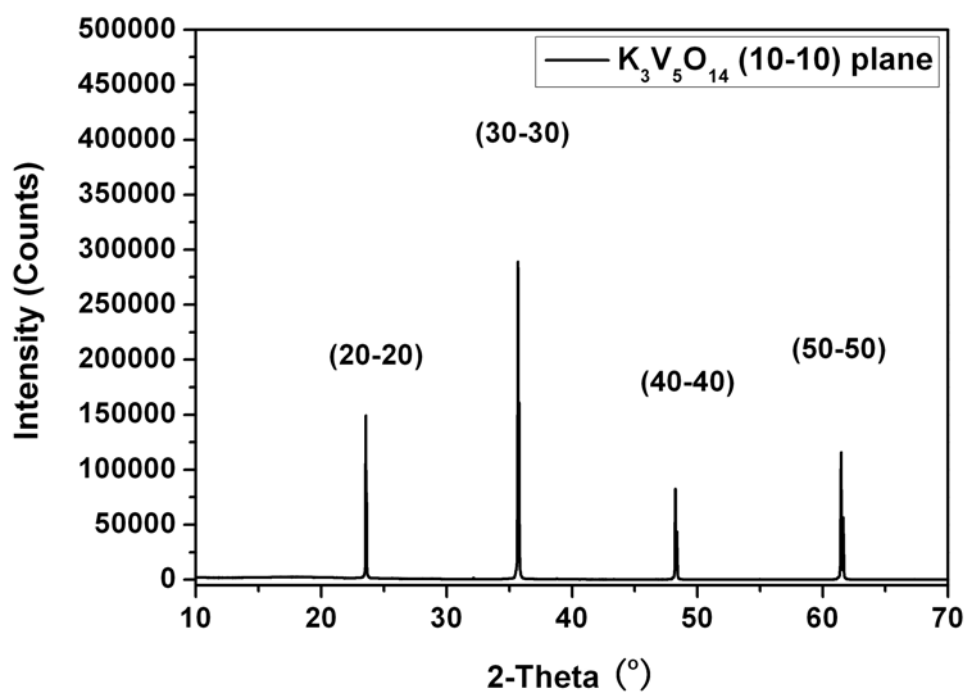

Figure S4. X-ray diffraction for {0001} planes.

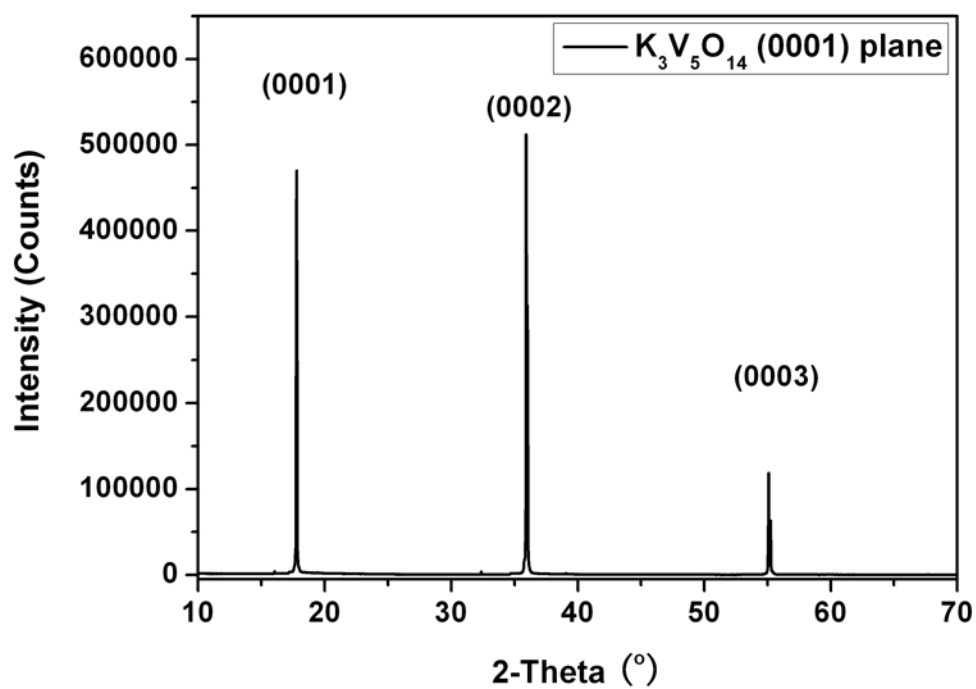

Figure S5. UV-vis diffuse reflectance spectra for ground  $K_3V_5O_{14}$  crystal.

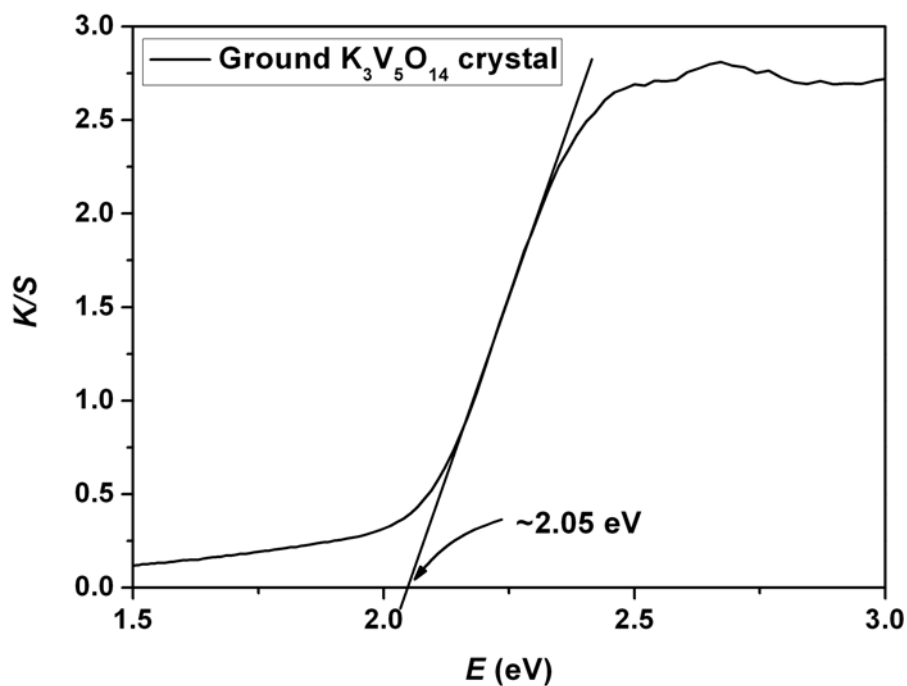

Figure S6. Displacement versus electric field (300 V) plot for Z-cut of  $K_3V_5O_{14}$  single crystal.

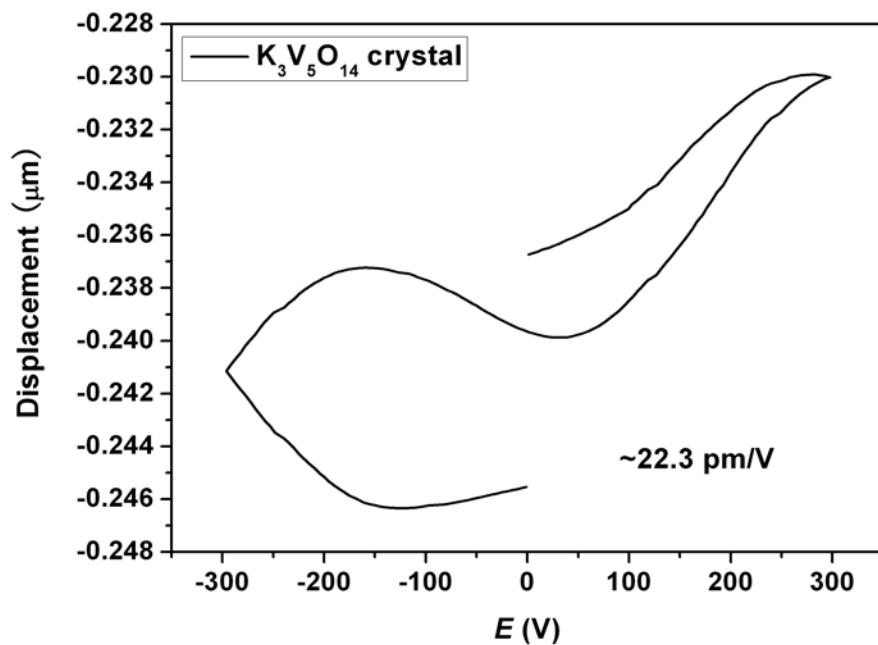

Figure S7. Displacement versus electric field (500 V) plot for Z-cut of  $K_3V_5O_{14}$  single crystal.

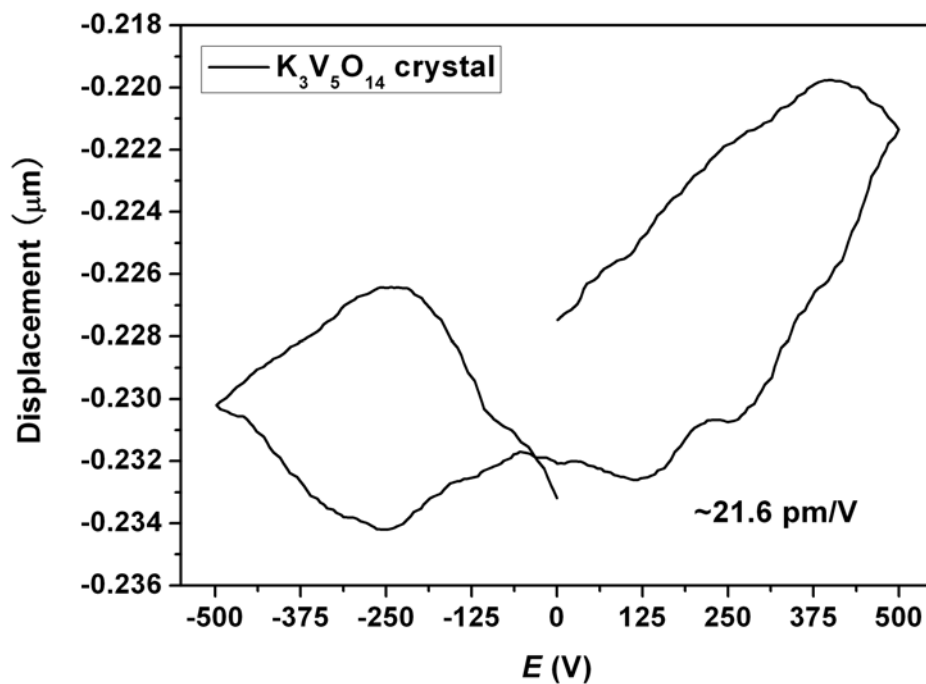

Figure S8. Displacement versus electric field (800 V) plot for Z-cut of  $K_3V_5O_{14}$  single crystal.

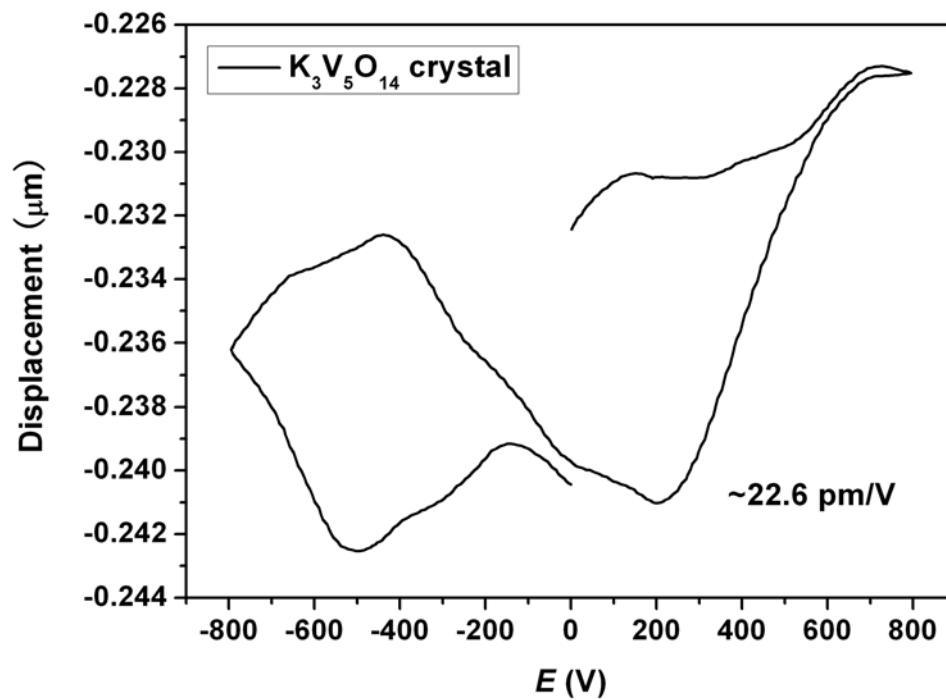

Figure S9. Polarization vs. temperature data (black color), and the temperature dependence of the pyroelectric coefficient (blue color) for Z-cut of  $K_3V_5O_{14}$  single crystal.

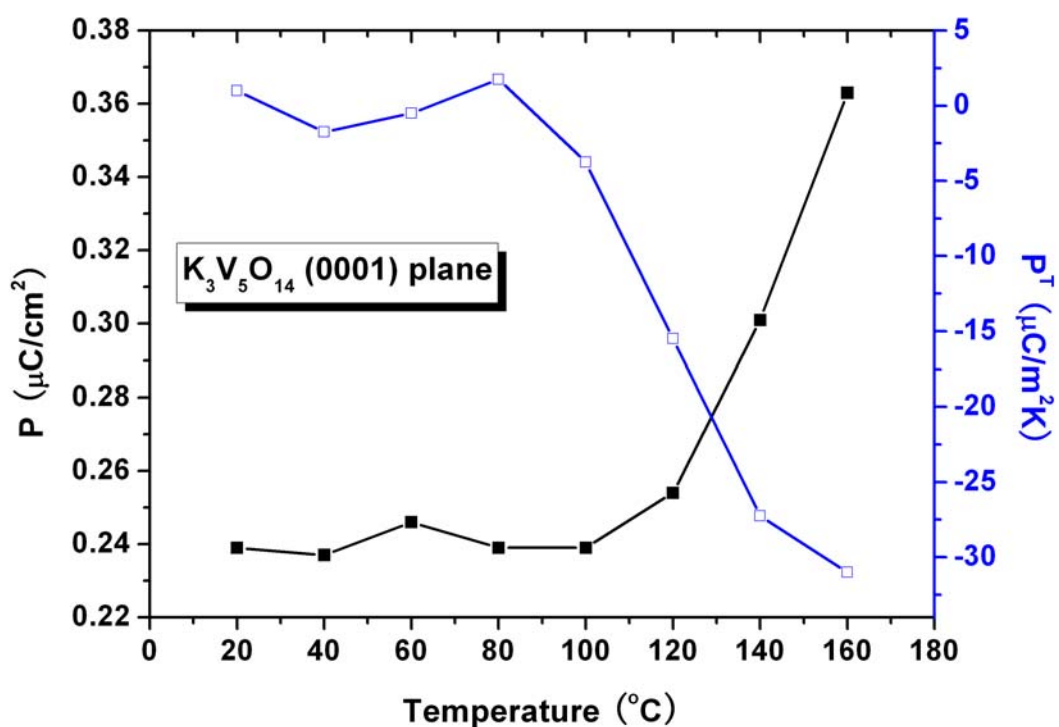

Figure S10. Polarization vs electric field plots at 16 kV/cm at different frequencies for a Z-cut  $K_3V_5O_{14}$  single crystal.

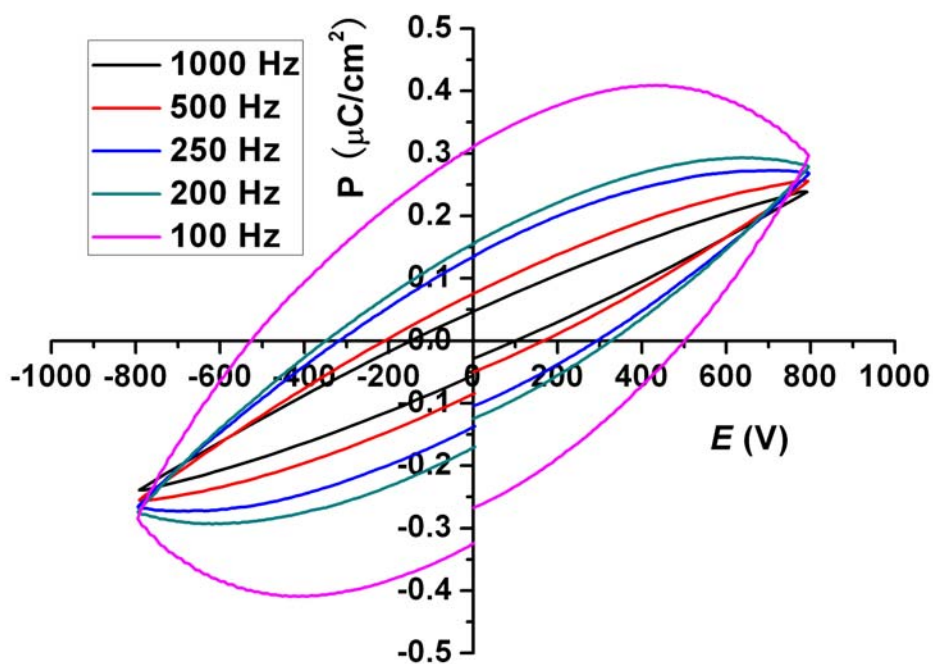

Supplement: c2ce25931a.pdf [file c2ce25931a.pdf]
